# Supplementary material for: Size-Controlled Ammonium-Based Homopolymers as Broad-Spectrum Antibacterials
Source: MDPI journal article supplement (doi:10.3390/antibiotics12081320), 2023-08-16
Supplement: s1 [file s1]

## Supplementary Materials

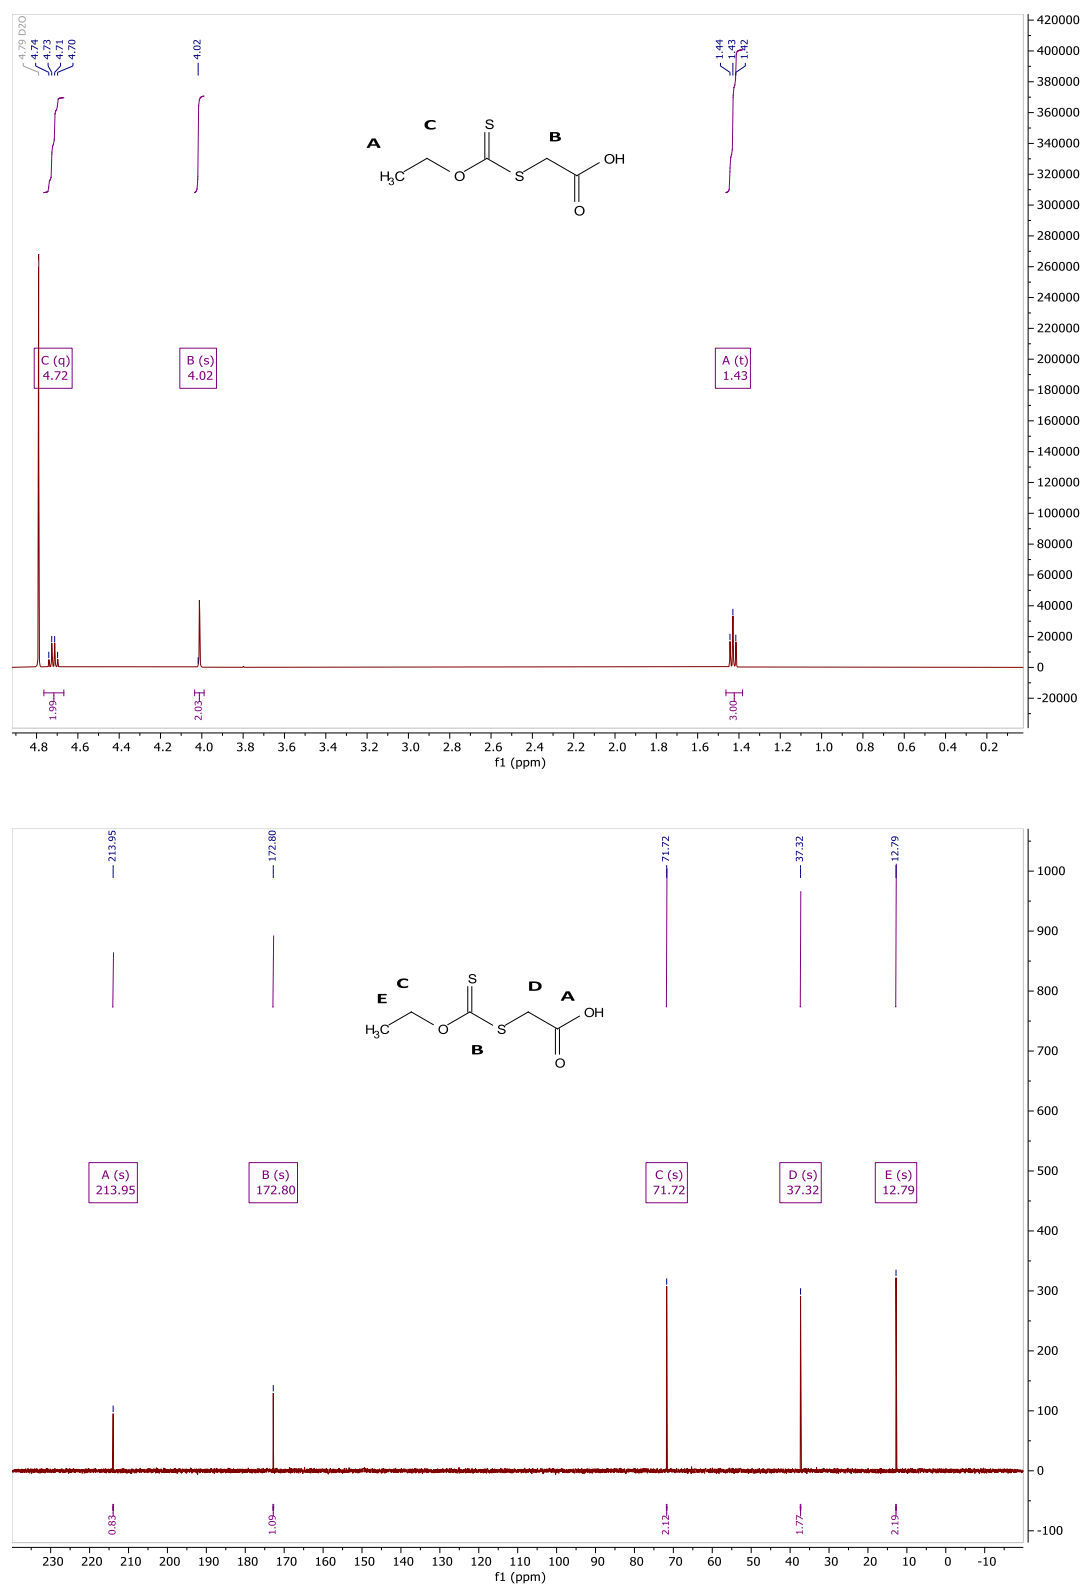

**Figure S1.** (a)  $^1\text{H}$  NMR spectra of chain transfer agent 3 recorded in  $\text{D}_2\text{O}$ , with peak assignments, (b)  $^{13}\text{C}$  NMR of the chain transfer agent 3 recorded in  $\text{D}_2\text{O}$ , with peak assignments.

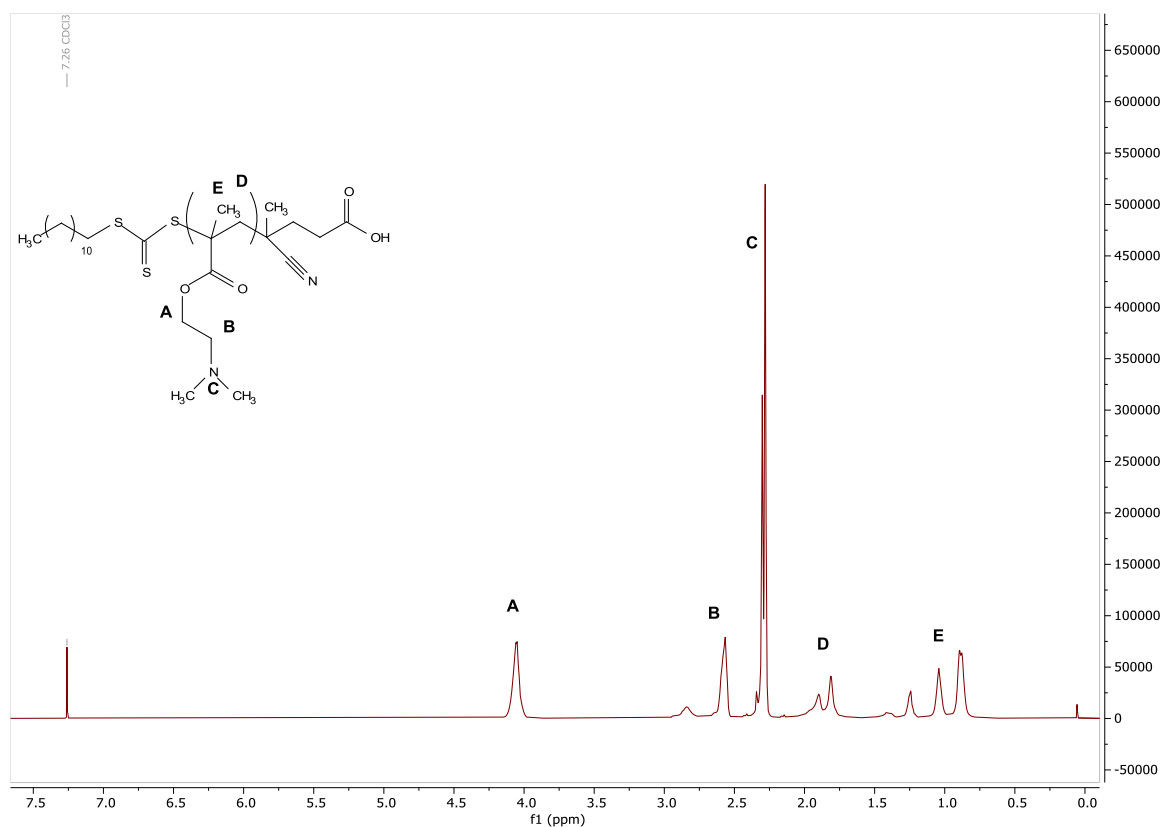

**Figure S2.**  $^1\text{H}$  NMR spectra of poly(2-(dimethylamino)ethyl methacrylate) recorded in CDCl<sub>3</sub>, with peak assignments. E, D represent the peaks of the polymer's main chain; A, B, C represent the peaks of polymer's side chain.

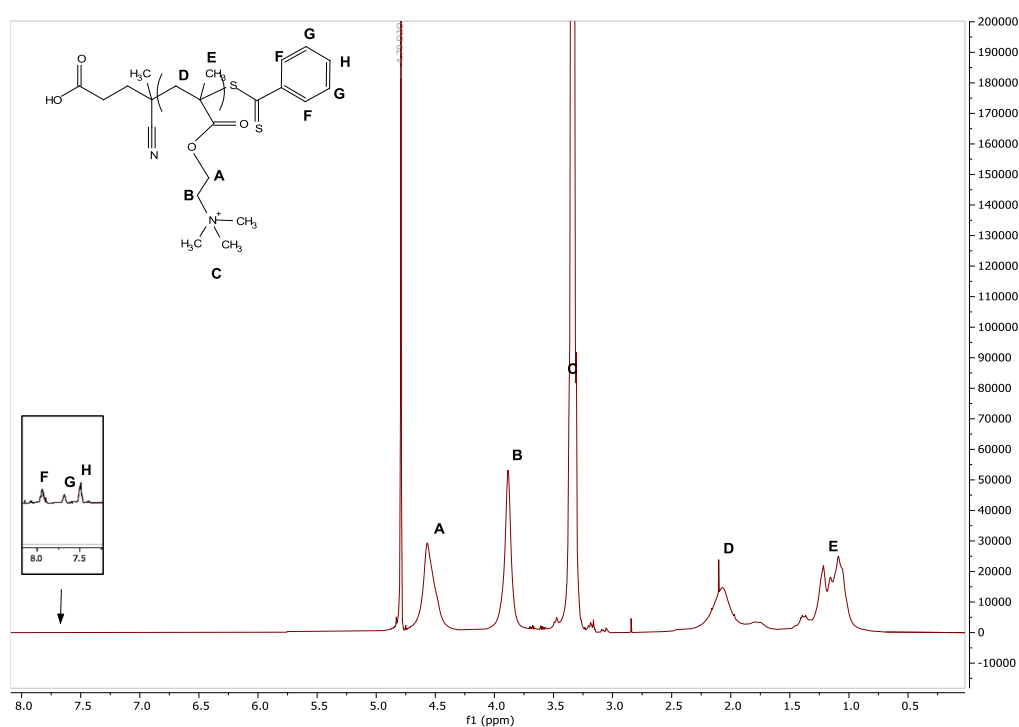

**Figure S3.**  $^1\text{H}$  NMR spectra of poly([2-(methacryloyloxy)ethyl]trimethylammonium chloride) recorded in  $\text{D}_2\text{O}$ , with peak assignments. E, D represent the peaks of the polymer's main chain; A, B, C represent the peaks of polymer's side chain. Inset (F, G, H) shows the region of the RAFT agent.

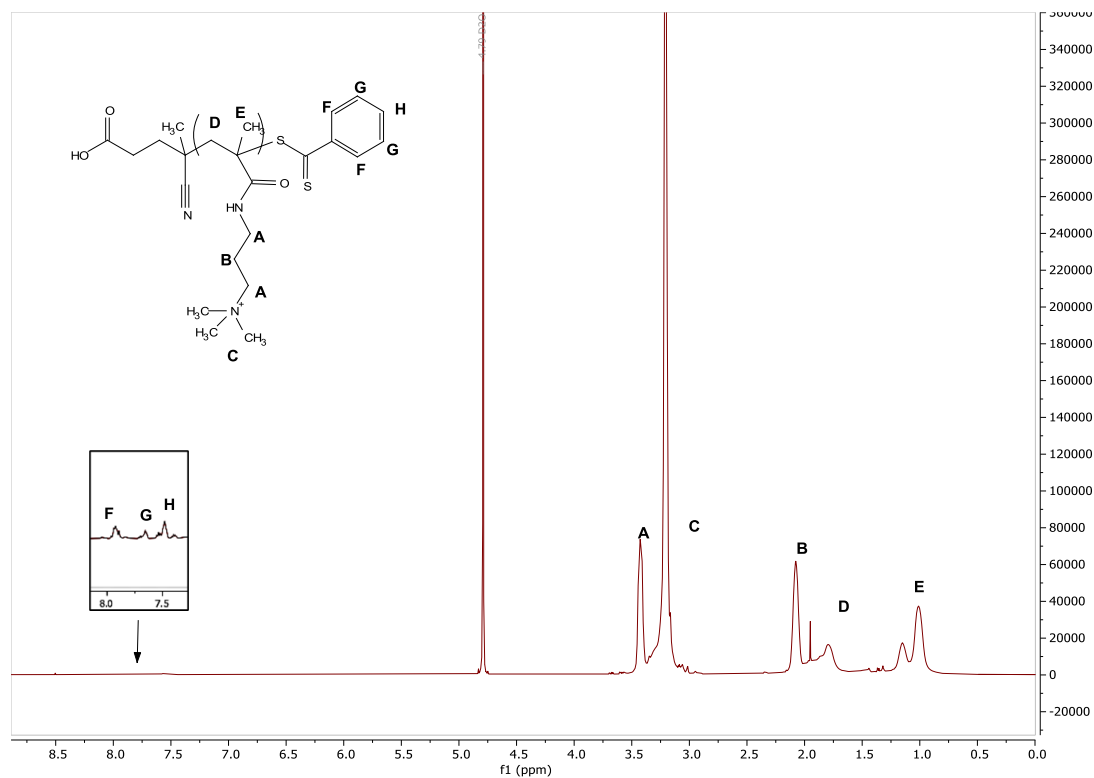

**Figure S4.**  $^1\text{H}$  NMR spectra of poly[3-(methacryloylamino)propyl]trimethylammonium chloride recorded in  $\text{D}_2\text{O}$ , with peak assignments. E, D represent the peaks of polymer's main chain; A, B, C represent the peaks of polymer's side chain. Inset (F, G, H) shows the region of the RAFT agent.

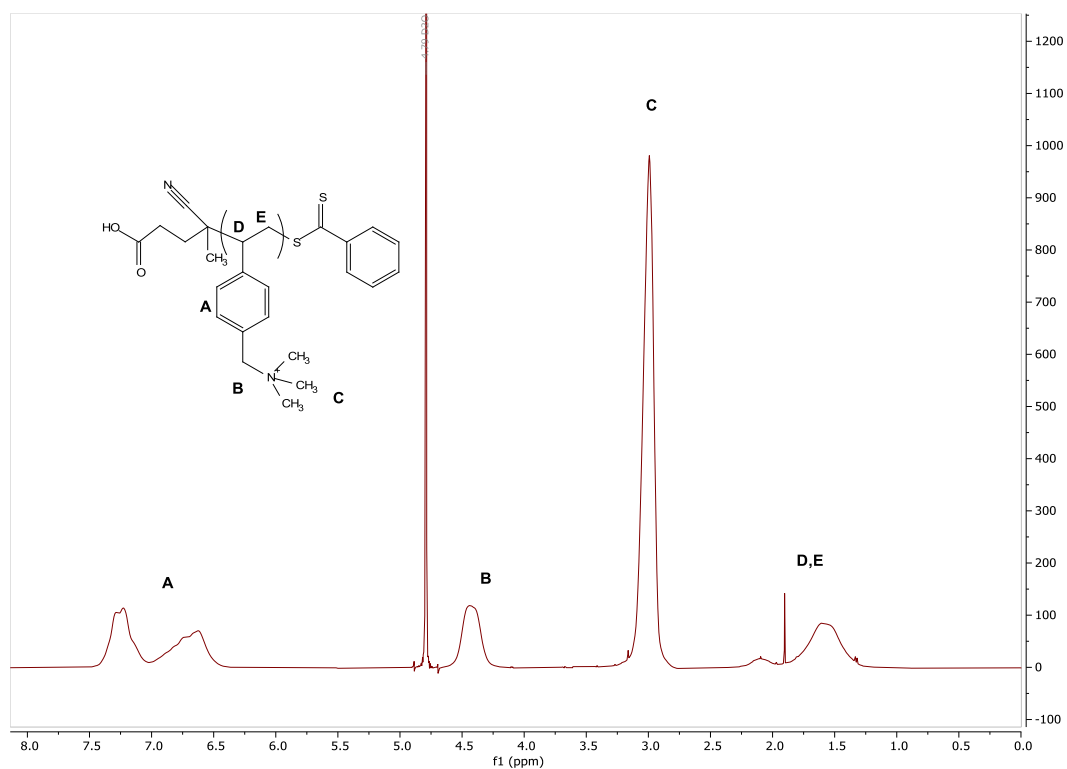

**Figure S5.**  $^1\text{H}$  NMR spectra of poly(vinylbenzyl trimethylammonium chloride) recorded in  $\text{D}_2\text{O}$ , with peak assignments. E, D represent the peaks of polymer's main chain; A, B, C represent the peaks of polymer's side chain.

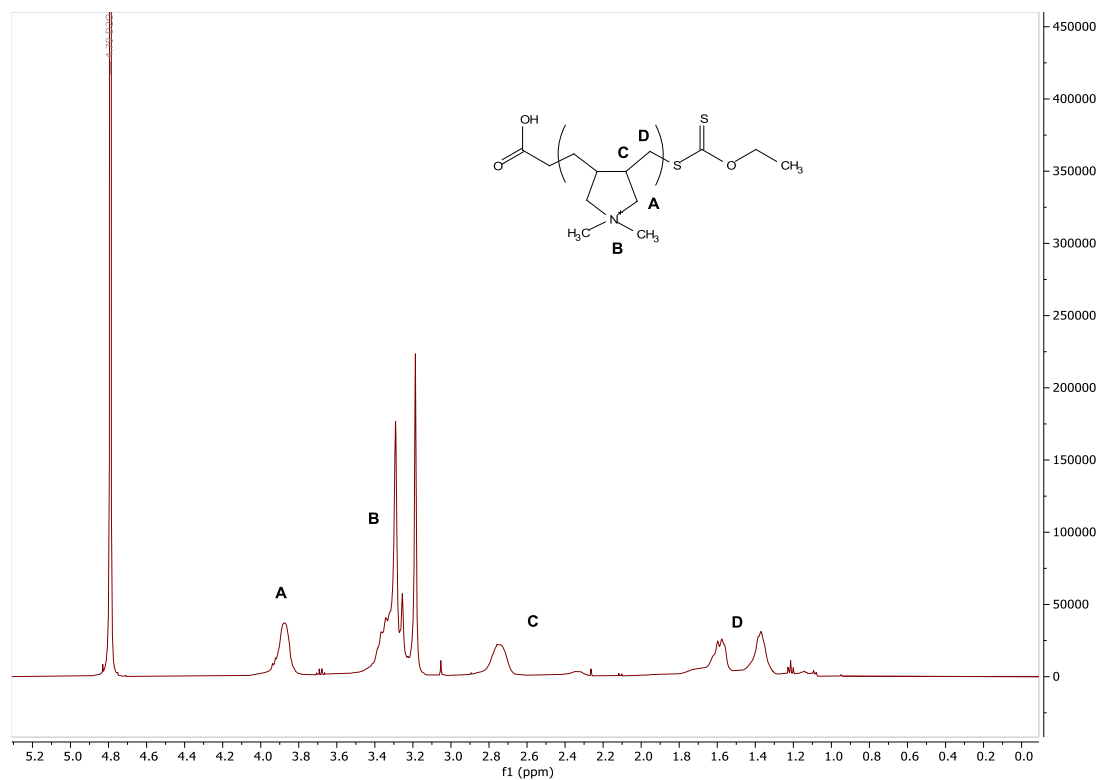

**Figure S6.**  $^1\text{H}$  NMR spectra of poly (diallyldimethyl ammonium chloride) recorded in  $\text{D}_2\text{O}$ , with peak assignments. C and D represent the peaks of polymer's main chain; A and B represent the peaks of polymer's side chain.

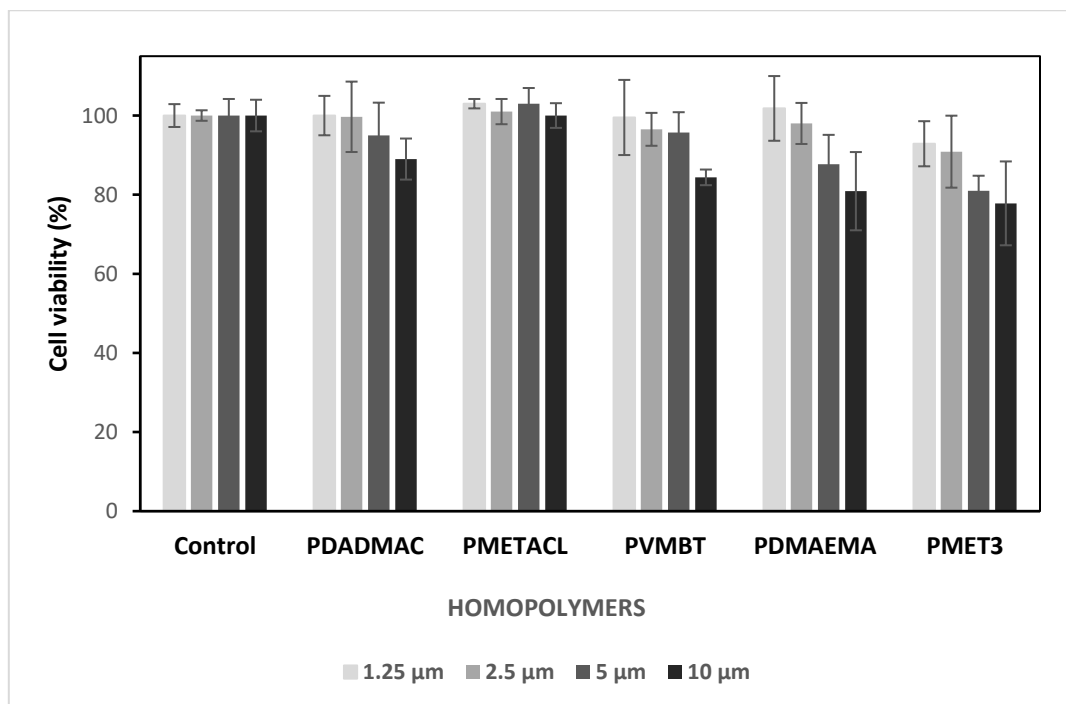

**Figure S7.** Assessment of HeLa cell viability in the presence of five homopolymers ( $\text{Mw} \sim 20$  kDa) using an MTT assay.

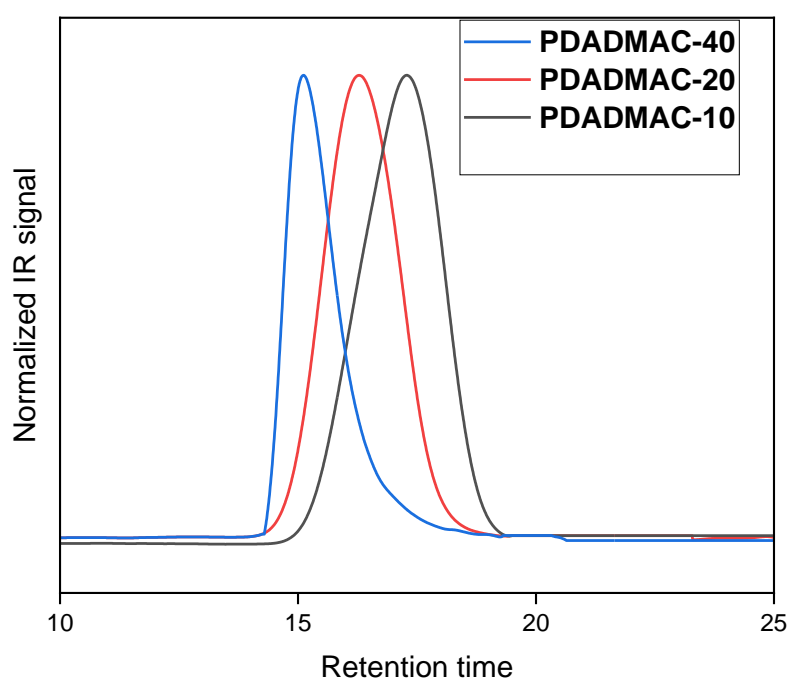

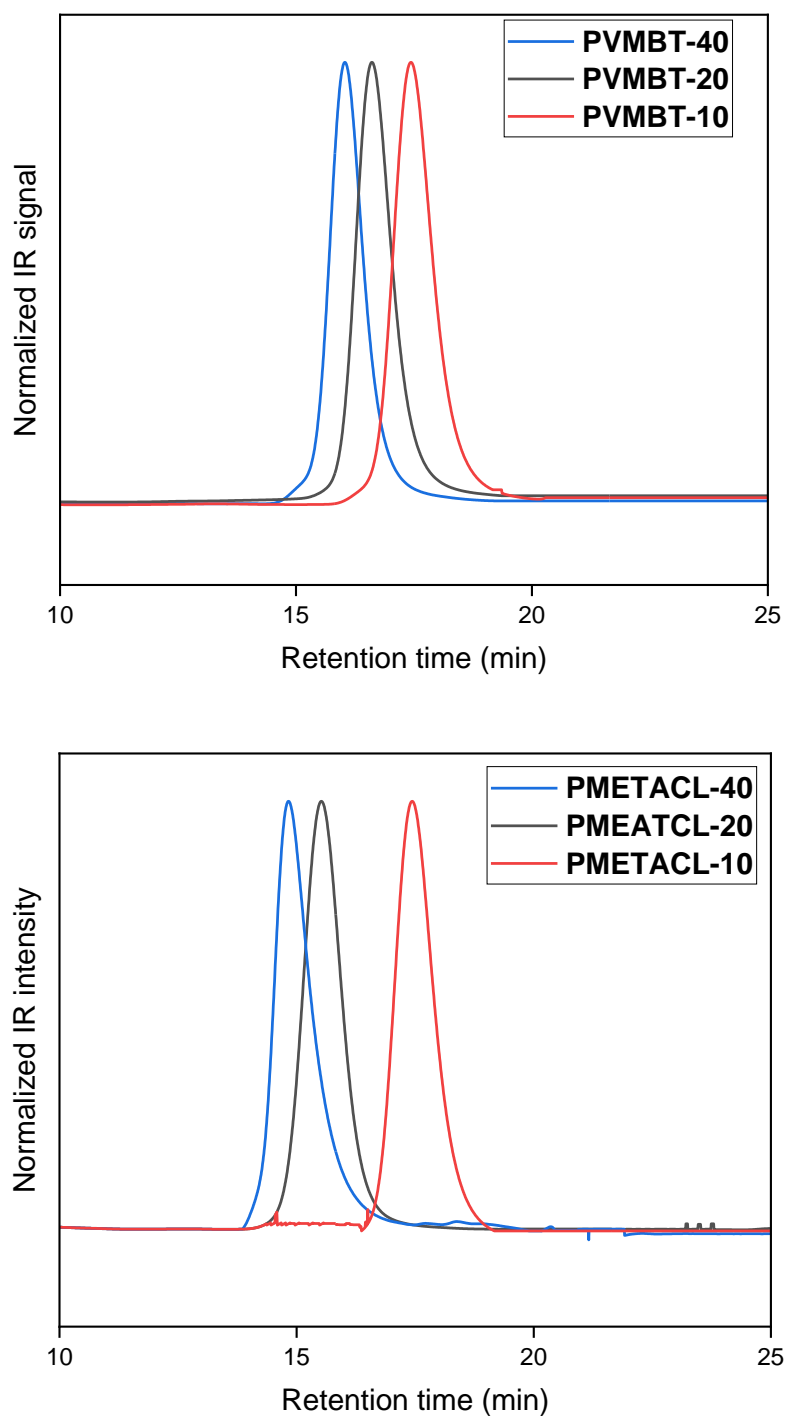

**Figure S8.** GPC analysis of three different molecular weight of PDADMACs, PMETCLs, PVMBTs with elution using an aqueous buffer of 0.50 M acetic acid and 0.30 M  $\text{NaH}_2\text{PO}_4$  (pH 2.5) at a flow rate of  $1.0 \text{ ml min}^{-1}$  at  $25^\circ\text{C}$ . Peaks relative to poly(ethylene glycol) standards.

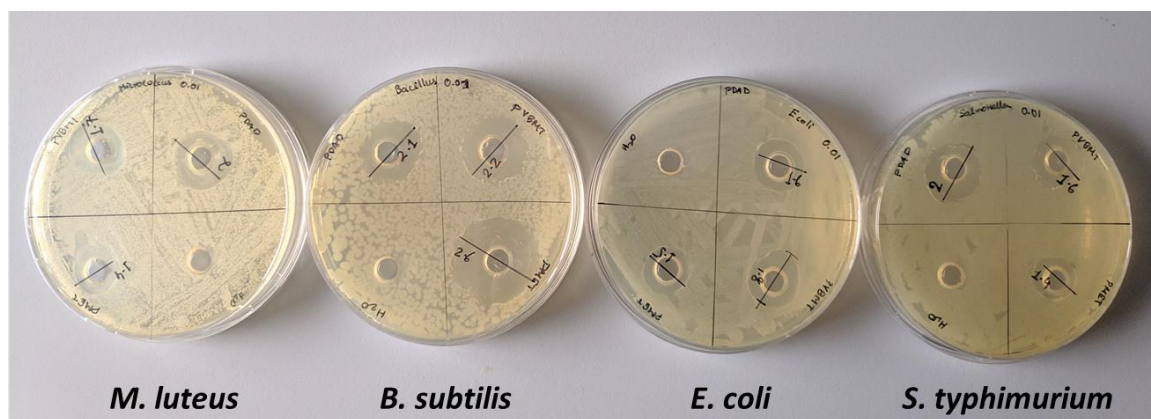

**Figure S9.** Agar plates were inoculated with the target bacterial species and wells of 1 cm diameter were punched into the plates and 100  $\mu$ L of polymer solutions (at 2xMIC) were added into the wells and incubated overnight before the zones of inhibition were measured.

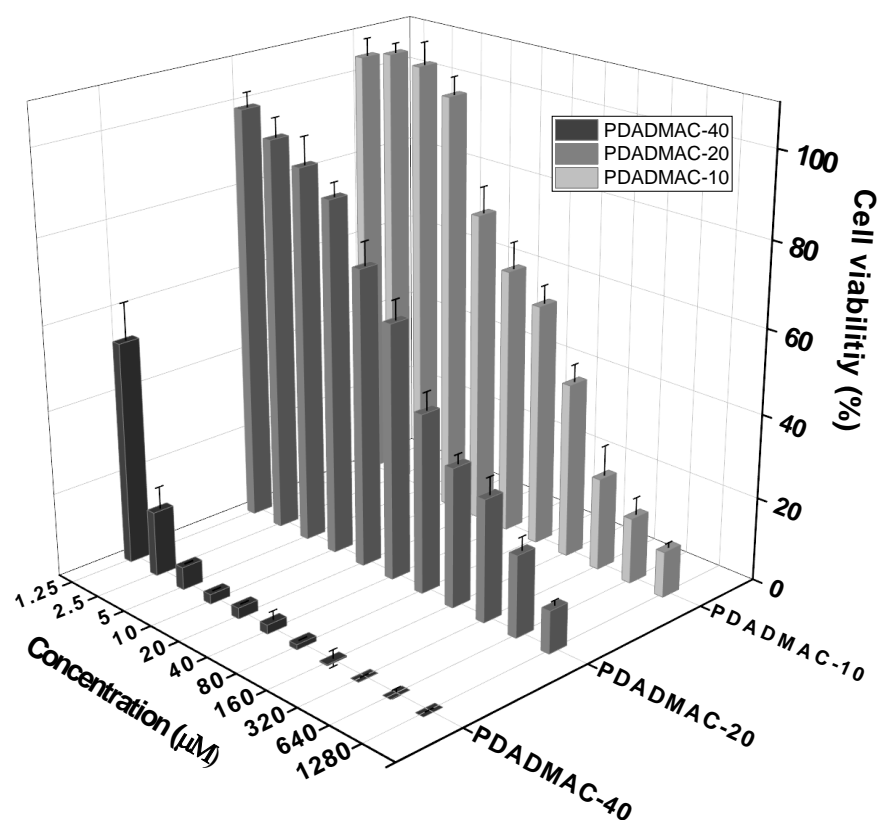

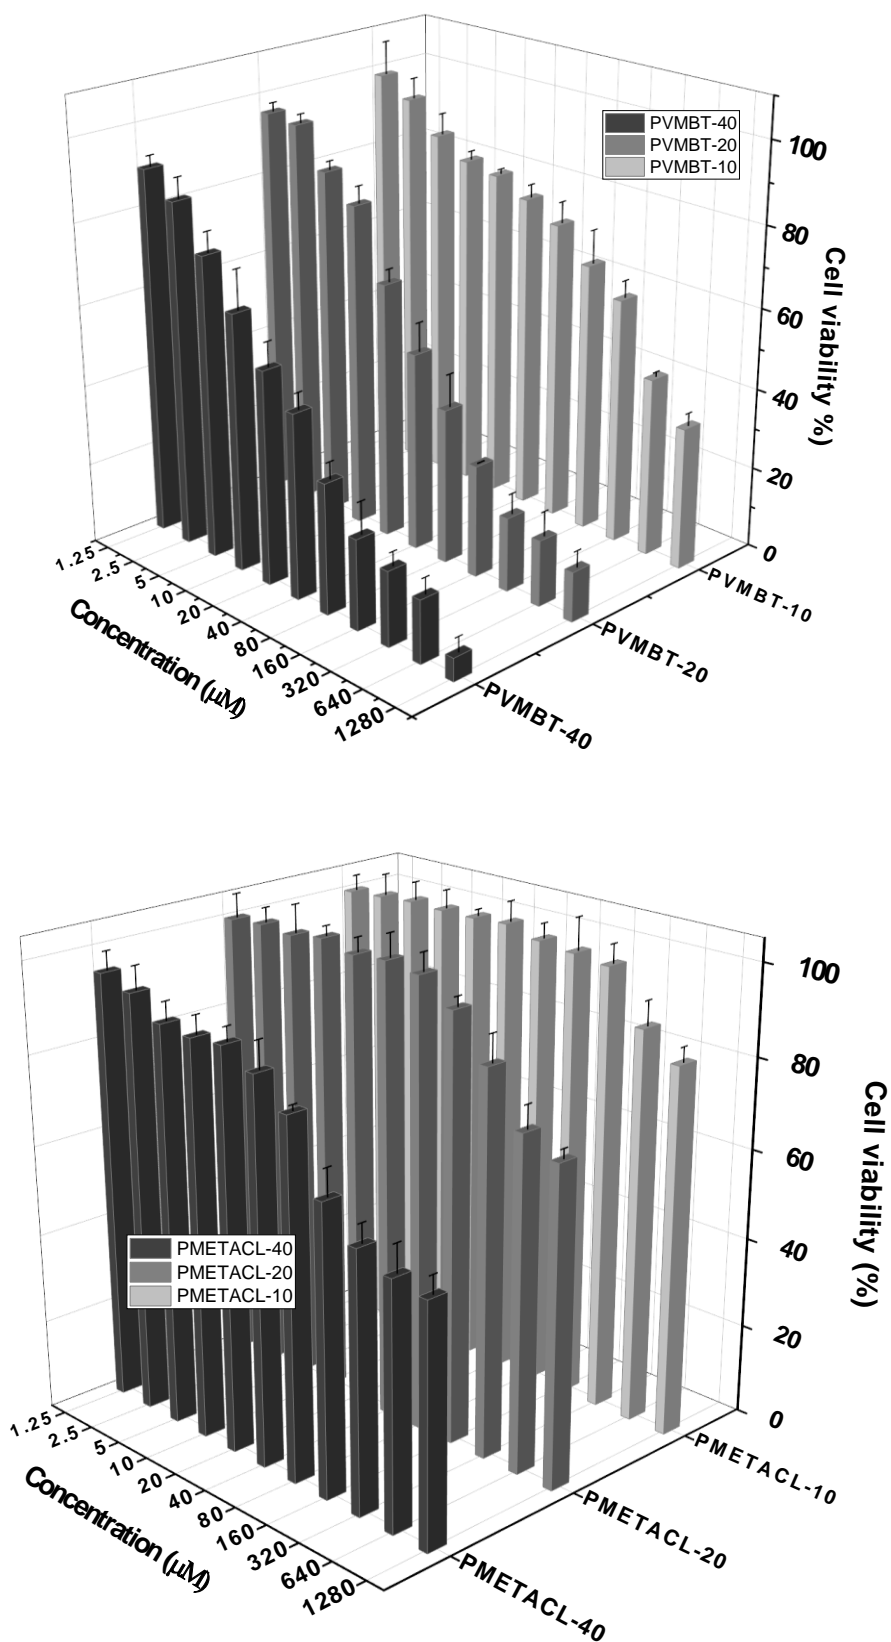

**Figure S10.** Cytotoxicity of different molecular weights of the polymers (PDADMACs, PVMBTs and PMEATCLs).

**Table S1.** Zone of inhibitions (agar well diffusion assay) in cm.

| <i>Polymers</i> | <i>B. subtilis</i> | <i>M. luteus</i> | <i>E.coli</i> | <i>S. typhimurium</i> |
|-----------------|--------------------|------------------|---------------|-----------------------|
| PDADMAC-40      | 2.1                | 2                | 1.6           | 2.0                   |
| PMETACL-40      | 2.6                | 1.4              | 1.5           | 1.9                   |
| PVBMT-40        | 2.2                | 1.7              | 1.8           | 1.6                   |
